# Supplementary material for: The Antifungal Activity of Ag/CHI NPs against Rhizoctonia solani Linked with Tomato Plant Health
Source: Plants (Basel). 2021 Oct 25;10(11):2283. doi: 10.3390/plants10112283 (PMC8618975; doi:10.3390/plants10112283)
Supplement: Supplementary file 1 [file plants-10-02283-s001.zip › plants-1368606-supplementary.pdf]

## Supplementary information

# The Antifungal Activity of Ag/CHI NPs against *Rhizoctonia solani* Linked with Tomato Plant Health

Ameena A. AL-Surhanee<sup>1</sup>, Muhammad Afzal<sup>2,3,\*</sup>, NahlaAlsayedBouqellah<sup>4</sup>, Salama A. Ouf<sup>5</sup>, Sajid Muhammad<sup>6</sup>, Mehmood Jan<sup>6</sup>, Sidra Kaleem<sup>7</sup>, Mohamed Hashem<sup>8,9</sup>, SaadAlamri<sup>8</sup>, Arafat Abdel Hamed Abdel Latef<sup>10</sup>, Omar M. Ali<sup>11</sup> and Mona H.Soliman<sup>5,12</sup>

<sup>1</sup> Biology Department, College of Science, Jouf University, Sakaka 2014, Saudi Arabia; amaserhani@ju.edu.sa

<sup>2</sup> Institute of Soil and Water Resources and Environmental Science, College of Environment and Resource Sciences, Zhejiang University, Hangzhou 310058, China

<sup>3</sup> Islamic Girls School and College, Parachinar, 26301, KPK, Pakistan

<sup>4</sup> Taibah University, Science College, Biology Department, Al Madinah Al Munawwarah 42317- 8599, Saudi Arabia; Nahla.B@hotmail.co.uk

<sup>5</sup> Botany and Microbiology Department, Faculty of Science, Cairo University, Giza 12613, Egypt; SaOuFeg@yahoo.com

<sup>6</sup> Institute of Crop Science, College of Agriculture and Biotechnology, Zhejiang University, Hangzhou 310058, China; msajid1772@gmail.com (S.M.); mehmoodjan89@gmail.com(M.J.)

<sup>7</sup> Ocean College of Science and Engineering, Zhejiang University, 316021, China, kaleemsidra85@yahoo.com

<sup>8</sup> Department of Biology , College of Science, King Khalid University, Abha 61413, Saudi Arabia, Drmhashem69@yahoo.com (M.H.); Amri555@yahoo.com (S.A.)

<sup>9</sup> Assiut University, Faculty of Science, Botany and Microbiology Department, Assiut 71516, Egypt

<sup>10</sup> Botany and Microbiology Department, Faculty of Science, South Valley University, Qena 83523, Egypt; moawad76@gmail.com

<sup>11</sup> Department of Chemistry, Turabah University College, Turabah Branch, Taif University, P.O. Box 11099, Taif 21944, Saudi Arabia; om.ali@tu.edu.sa

<sup>12</sup> Biology Department, Faculty of Science, Taibah University, Al-Sharm, Yanbu El-Bahr, Yanbu 46429, Saudi Arabia; hmona@sci.cu.edu.eg or monahsh1@gmail.com

\* Correspondence: mafzal.kust@gmail.com; Tel.: +92-3348272264

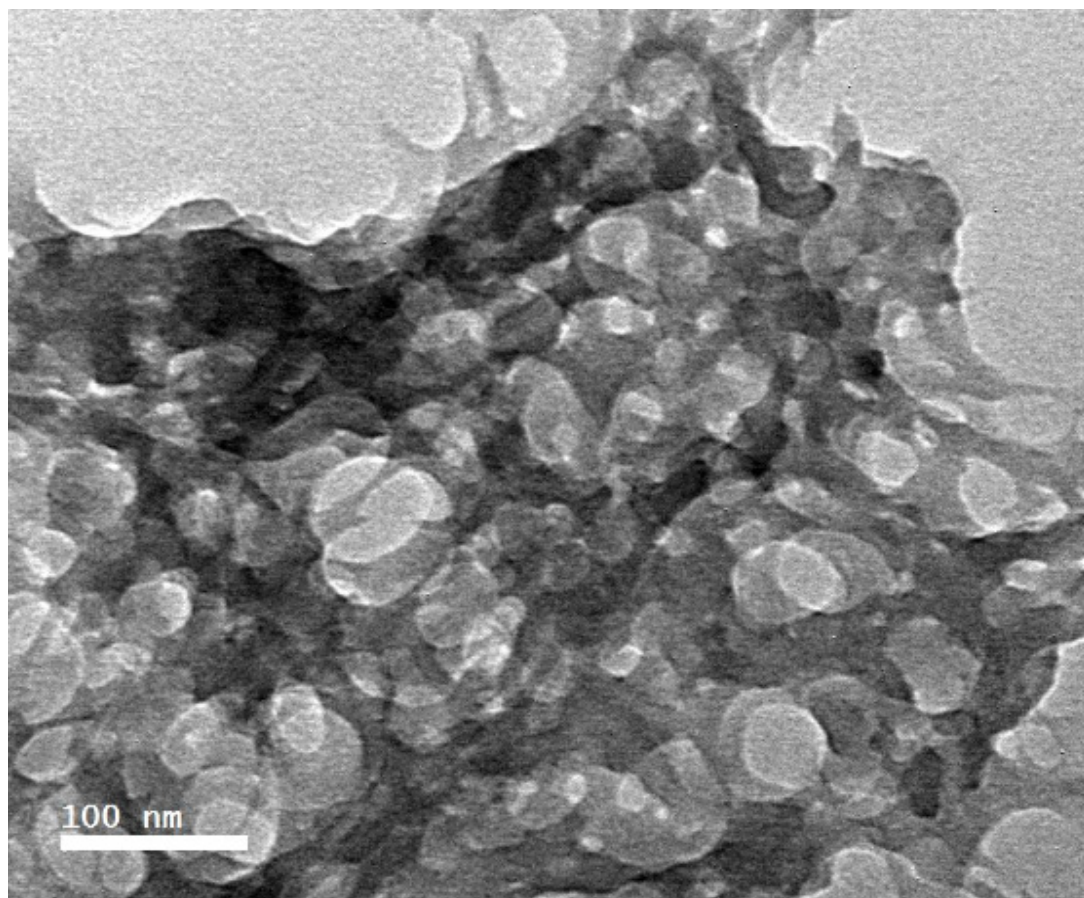

**Figure S1.** TEM of Silver nanoparticles adhered to CHI NPs in 100 nm scale, histogram to average size of the silver NPs and CHI NPs were estimated by imageJ® software.

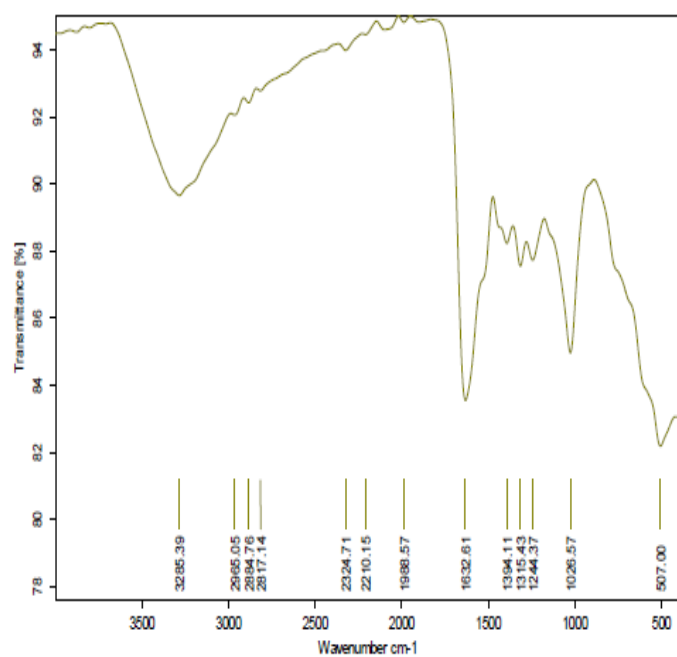

**Figure S2(a).** FTIR of AgNPs.

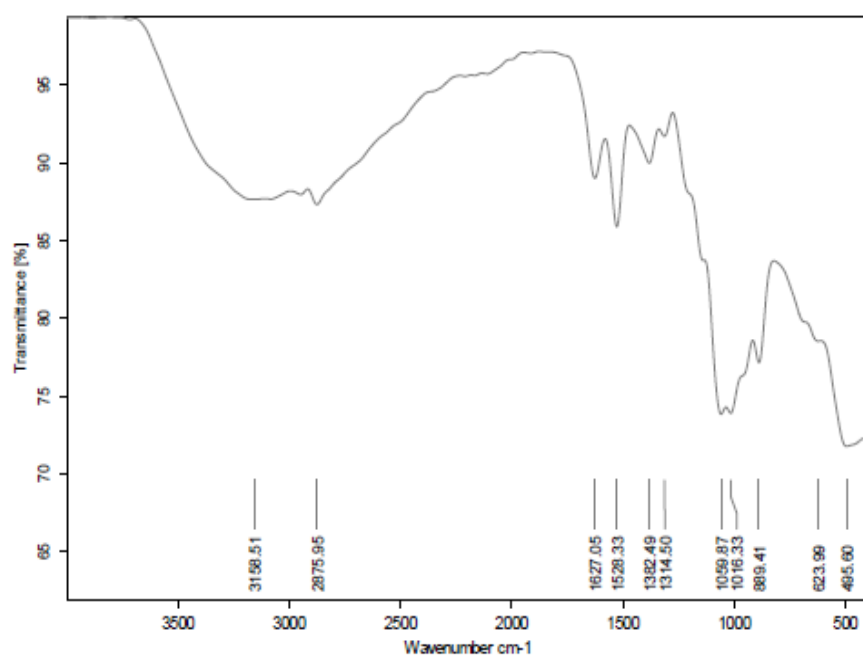

**Figure S2(b).** FTIR of CHI NPS.

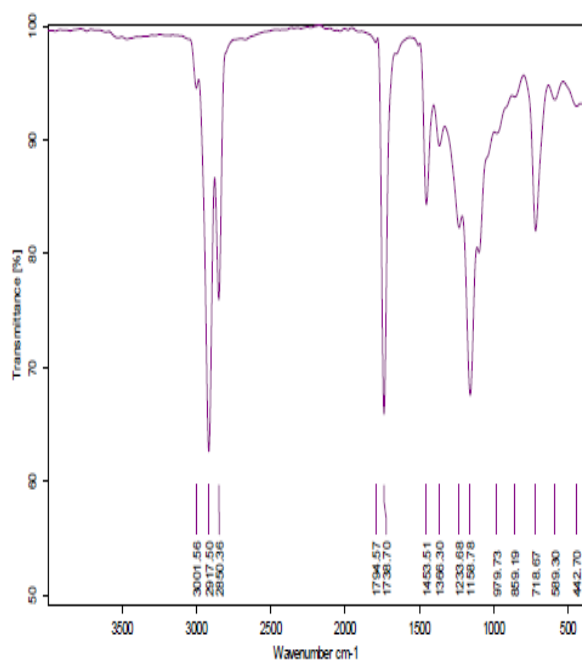

**Figure S2(c).** FTIR of CHI NPs -AgNPs.

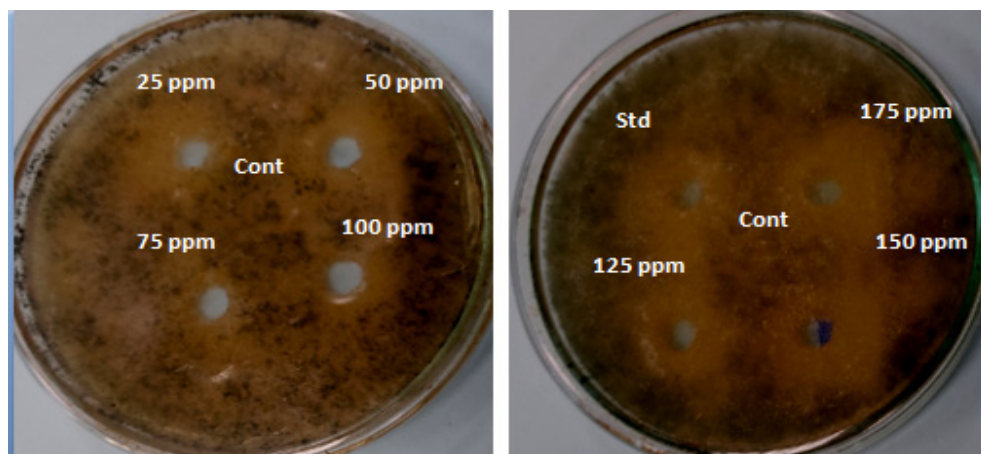

**Figure S3.** Ag/CHI NC concentrations.

**Table S1.** Genes and Primers used for Q-PCR.

| Gene Name       |   | Sequence                             |
|-----------------|---|--------------------------------------|
| GST             | F | 5'- ACAAAAAGAGAGCTTGAGCAGC -3'       |
|                 | R | 5'- TCCTGGCAGGCATTTTGTCT -3'         |
| AFPRT           | F | 5'- GTCGTCTTC TGC CCA TGA TT -3'     |
|                 | R | 5'- ACG TGG AGC ATG GTG TAT CA -3'   |
| PAL1            | F | 5'- TCG CAA TCG CAA ACA TC -3'       |
|                 | R | 5'- TGC CCT TGA ACC CGT AGT C -3'    |
| Defensin (PR12) | F | 5'-CCAAATGCCTCGTCATCT-3'             |
|                 | R | 5'-ATTAGAGTCAAGCTCAAAAGG-3'          |
| Chitinase (PR3) | F | 5'-GCGGATCCCAACGCACTGCAACCGATTAT-3'  |
|                 | R | 5'-GCCCATGGAAGGAATCAGTTATGCGCAAAT-3' |
| $\beta$ -Actin  | F | 5'-GTGCCCATTACGAAGGATA- 3'           |
|                 | R | 5'-GAAGACTCCATGCCGATCAT- 3'          |
| Fungal ITS      | F | TCTGTAGGTGAACCTGCGG                  |
|                 | R | TCCTCCGCTTATTGATATGC                 |

**Table S2.** Concentration (ppm) and inhibitory zones (mm) of Ag-Chitosan and Fungistatin.

| Treatment                         | Concentration (ppm) | Growth reduction zone (mm) |
|-----------------------------------|---------------------|----------------------------|
| <b>Ag-Chitosan concentrations</b> | 25                  | 13.483±0.289               |
|                                   | 50                  | 17.33±0.288                |
|                                   | 75                  | 18.7000±0.05               |
|                                   | 100                 | 21.217±0.287               |
|                                   | 125                 | 23.93±0.29                 |
|                                   | 150                 | 25.817±0.288               |
|                                   | 175                 | 27.117±0.29                |
| <b>Fungistatin (Std)</b>          | 5 µL                | 24.57±0.29                 |

**Table S3.** Treatment and germination schedule.

| Soil inoculation<br>with <i>R. Solani</i><br>One week before<br>transplantation | Foliar<br>application<br>NC (200<br>ppm) | <b>Germination</b>                                                                           |                                                   |                                   |
|---------------------------------------------------------------------------------|------------------------------------------|----------------------------------------------------------------------------------------------|---------------------------------------------------|-----------------------------------|
|                                                                                 |                                          | 15 days<br>In peat moss<br>(15 DAS)                                                          | Transplantation (pot exp.)<br>7 days<br>(22 DAYS) | (Pot exp.)<br>7 days<br>(29 DAYS) |
| Un inoculated                                                                   | control                                  | Seed growing in peat moss<br>and regularly irrigated with<br>¼ strength Hoagland<br>solution | regularly irrigated                               |                                   |
|                                                                                 | NC                                       |                                                                                              | NC foliar every 3 days +<br>regularly irrigated   | regularly irrigated               |
| Inoculated                                                                      | P                                        |                                                                                              | regularly irrigated                               |                                   |
|                                                                                 | P+ NC                                    |                                                                                              | NC foliar every 3 days +<br>regularly irrigated   | regularly irrigated               |
